# Supplementary material for: Effect of Hay Steaming on the Estimated Precaecal Digestibility of Crude Protein and Selected Amino Acids in Horses
Source: Animals (Basel). 2022 Nov 10;12(22):3092. doi: 10.3390/ani12223092 (PMC9686632; doi:10.3390/ani12223092)
Supplement: Supplementary file 1 [file animals-12-03092-s001.zip › animals-1998454-supplementary.pdf]

**Table S1.** Evaluation of the hygienic status of hay by sensory analysis in accordance with Kamphues et al. [1].

| Parameters | nutritional value                                                                       |                 | hygienic status                                                             |                 |
|------------|-----------------------------------------------------------------------------------------|-----------------|-----------------------------------------------------------------------------|-----------------|
|            | findings                                                                                | points deducted | findings                                                                    | points deducted |
| Texture    | soft and leafy ((a lot) inflorescence)                                                  | 10              | dry                                                                         | 0               |
|            | low-leaved                                                                              | 7               | slightly clammy                                                             | -2              |
|            | very low leaved                                                                         | 5               | clammy, moist                                                               | -5              |
|            | stem-rich (inflorescences)                                                              | 2               |                                                                             |                 |
|            | strawy (deflowered)                                                                     | 0               |                                                                             |                 |
|            |                                                                                         |                 |                                                                             |                 |
| Odor       | aromatic (typically)                                                                    | 3               | unremarkable                                                                | 0               |
|            | lightly aromatic / mouldy                                                               | 1               | musty nuances                                                               | -5              |
|            | flat / rotten                                                                           | 0               | mouldy / putrid                                                             | -10             |
| Colour     | nicely green                                                                            | 5               | product - typical                                                           | 0               |
|            | slightly discoloured                                                                    | 3               | focally grey, whitish                                                       | -2              |
|            | strongly discoloured                                                                    | 1               | diffusely discoloured                                                       | -5              |
|            |                                                                                         |                 |                                                                             |                 |
| Impurities | macroscopic free                                                                        | 2               | none                                                                        | 0               |
|            | low sand/ soil content                                                                  | 1               | medium grade                                                                | -5              |
|            | high sand/ soil content                                                                 | 0               | high grade                                                                  | -10             |
|            | (turf, root mass, etc.)                                                                 |                 |                                                                             |                 |
| Note:      | possibly evaluate the proportion of plants with low forage value (thistles/honeysuckle) | -5 to -10       | Containing waste material. poisonous plants, plant parts altered by disease | -5 to -10       |

**Table S2.** Evaluation of forage value and hygienic status according to Kamphues et al. [1].

| nutritional value | points  | hygienic status  | points     |
|-------------------|---------|------------------|------------|
| very good         | 20 – 16 | flawless         | 0          |
| satisfying        | 15 – 10 | small deficits   | -1 to -5   |
| moderate          | 9 – 5   | clear deficits   | -6 to -10  |
| very low (strawy) | 4 – 0   | massive deficits | -11 to -40 |

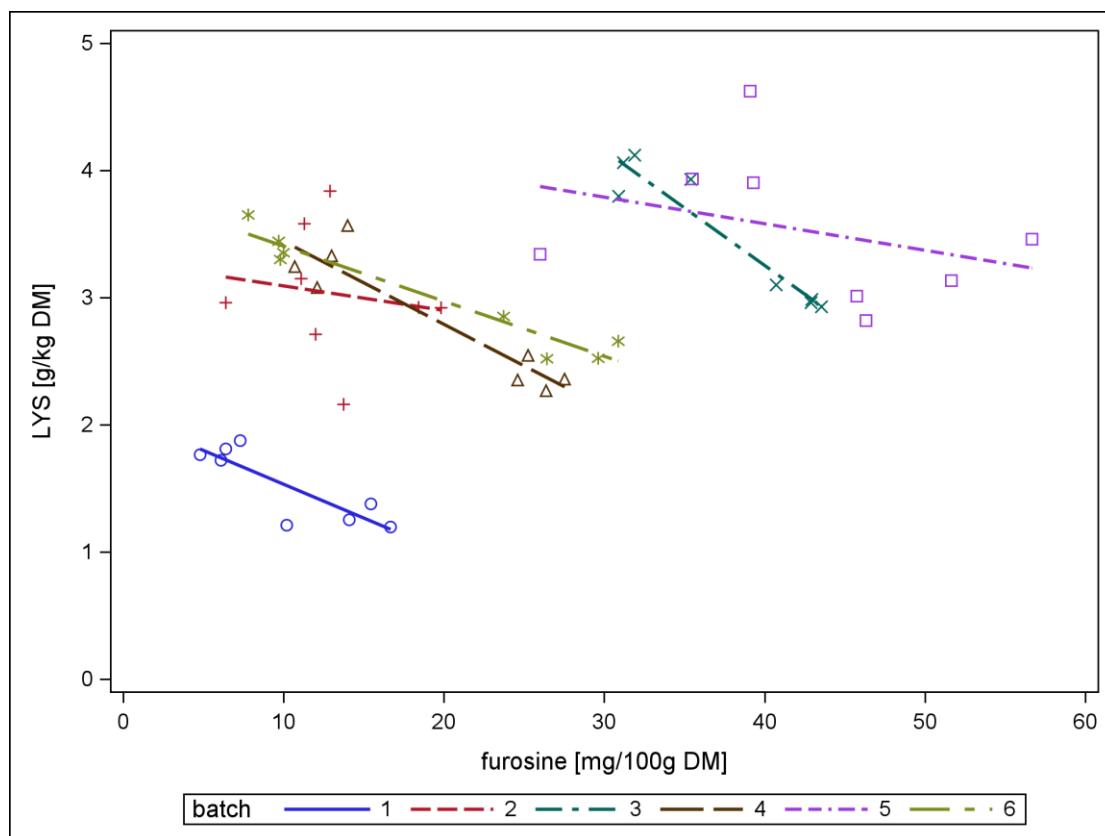

**Figure S1.** Lysine [g/kg DM] compared to furosine [mg/100g DM]

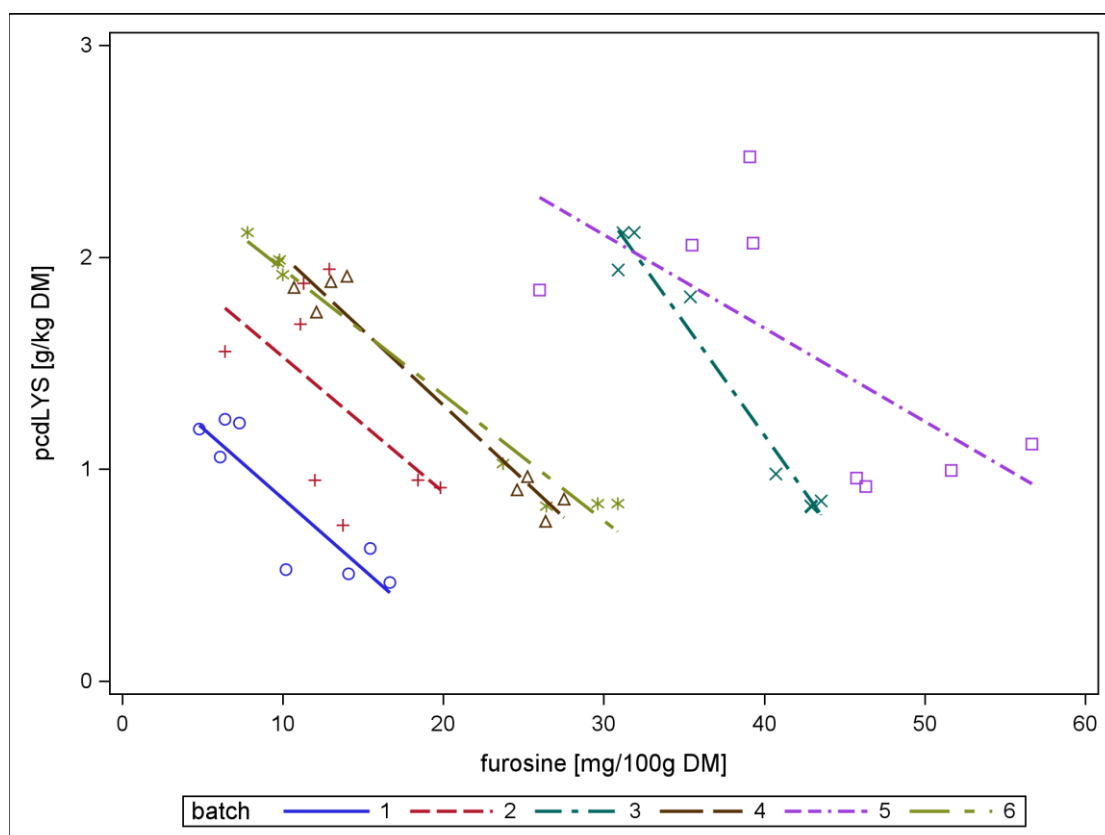

**Figure S2.** pcdLys [g/kg DM] compared to furosine [mg/100g DM]

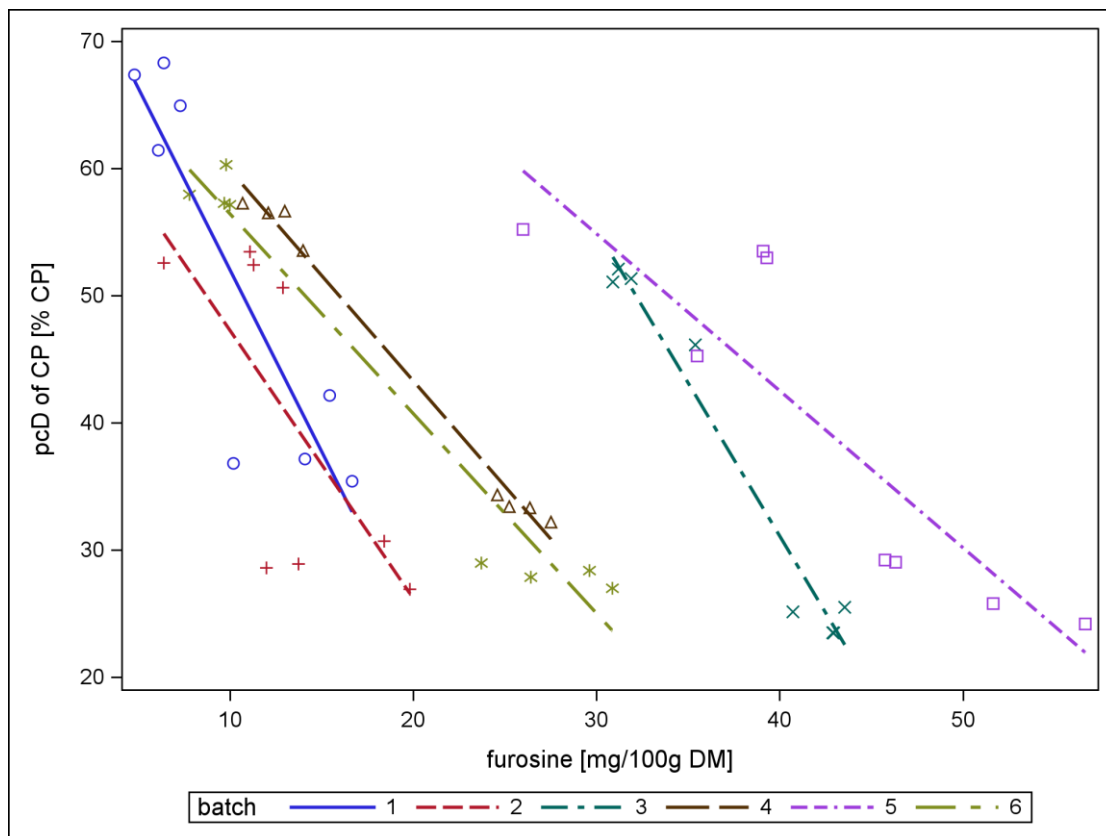

**Figure S3.** pcD of CP in [% CP] compared to furosine [mg/100g DM]

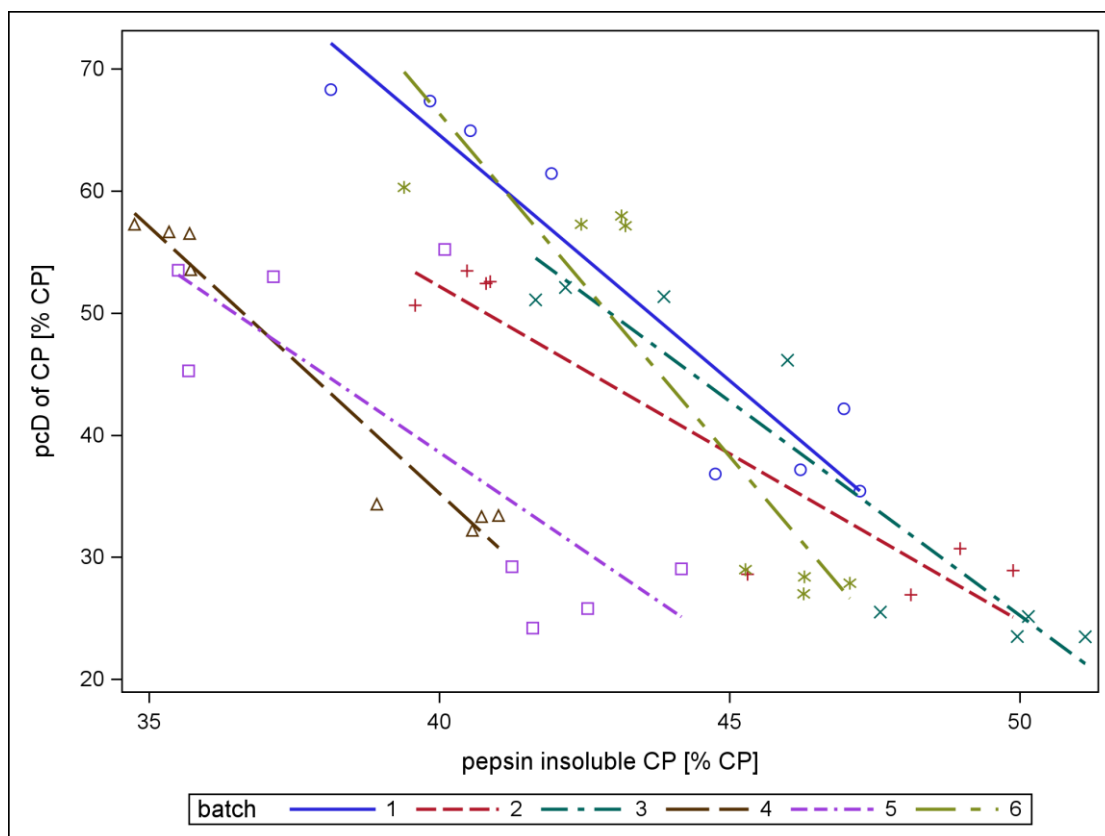

**Figure S4.** pcD of CP in [% CP] compared to piCP in [% CP]

Table S3. Linear regression for individual batch of hay with R<sup>2</sup> and significance *p*-value

| x     | furosine       |          | furosine       |          | pcD of CP      |          | pcD of CP      |          |
|-------|----------------|----------|----------------|----------|----------------|----------|----------------|----------|
| y     | lys            |          | pcdLYS         |          | piCP           |          | furosine       |          |
| batch | R <sup>2</sup> | <i>p</i> |
| 1     | 0.7199         | 0.008    | 0.7884         | 0.003    | 0.8997         | <0.001   | 0.7919         | 0.003    |
| 2     | 0.0255         | 0.706    | 0.3104         | 0.151    | 0.8722         | 0.001    | 0.5072         | 0.048    |
| 3     | 0.9142         | <0.001   | 0.9663         | <0.001   | 0.885          | <0.001   | 0.9652         | <0.001   |
| 4     | 0.854          | 0.001    | 0.9538         | <0.001   | 0.9533         | <0.001   | 0.9897         | <0.001   |
| 5     | 0.1155         | 0.410    | 0.4676         | 0.062    | 0.6023         | 0.024    | 0.7686         | 0.004    |
| 6     | 0.9322         | 0.001    | 0.9781         | <0.001   | 0.8028         | 0.003    | 0.957          | <0.001   |
| mean  | 0.59           |          | 0.74           |          | 0.84           |          | 0.83           |          |

x, x-axis; y, y-axis; Lys, lysine [g/kg DM]; furosine [mg/100g DM]; pcdLYS, pre-caecal digestible lysine [g/kg DM]; pcD of CP, pre-caecal digestibility of CP [% CP]; piCP, pepsin insoluble CP [% CP]
